# **Imprecision nutrition? Duplicate meals result in unreliable individual glycemic responses measured by continuous glucose monitors across four dietary patterns in adults without diabetes**

*Aaron Hengist<sup>1</sup>, Jude Anthony Ong<sup>1</sup>, Katherine McNeel<sup>1</sup>, Juen Guo<sup>1</sup>, Kevin D Hall<sup>1\*</sup>*

<sup>1</sup>National Institute of Diabetes and Digestive and Kidney Diseases, NIH, Bethesda, MD, USA

\*Corresponding Author: Kevin D Hall, [kevin.hall@nih.gov](mailto:kevin.hall@nih.gov)

Supported by the Intramural Research Program of the National Institutes of Health, National Institute of Diabetes & Digestive & Kidney Diseases.

Abbreviations: CGM, continuous glucose monitor, ICC, intra-class correlation coefficient

1 **Abstract**

2 **Background:** Continuous glucose monitors (CGMs) are being used to characterize  
3 postprandial glycemc responses and thereby provide personalized dietary advice to  
4 minimize glycemc excursions. However, the efficacy of such advice depends on reliable  
5 CGM responses.

6 **Objective:** To explore within-subject variability of CGM responses to duplicate meals in  
7 an inpatient setting.

8 **Methods:** CGM data were collected in two controlled feeding studies (NCT03407053 and  
9 NCT03878108) in 30 participants without diabetes capturing 1056 meal responses in  
10 duplicate ~1 week apart from four dietary patterns. One study used two different CGMs  
11 (Abbott Freestyle Libre Pro and Dexcom G4 Platinum) whereas the other study used only  
12 Dexcom. We calculated the incremental area under the curve (iAUC) for each 2-h post-  
13 meal period and compared within-subject iAUCs using the same CGM for the duplicate  
14 meals using linear correlations, intra-class correlation coefficients (ICC), Bland-Altman  
15 analyses, and compared individual variability of glycemc responses to duplicate meals  
16 versus different meals using standard deviations (SDs).

17 **Results:** There were weak to moderate positive linear correlations between within-  
18 subject iAUCs for duplicate meals (Abbott  $r=0.47$ ,  $p<0.0001$ , Dexcom  $r=0.43$ ,  $p<0.0001$ ),  
19 with low within-participant reliability indicated by ICC (Abbott 0.31, Dexcom 0.14). Bland-  
20 Altman analyses indicated wide limits of agreement (Abbott -31.3 to 31.5 mg/dL, Dexcom  
21 -30.8 to 30.4 mg/dL) but no significant bias of mean iAUCs for duplicate meals (Abbott  
22 0.1 mg/dL, Dexcom -0.2 mg/dL). Individual variability of glycemc responses to duplicate  
23 meals was similar to that of different meals evaluated each diet week for both Abbott

24 (SD<sub>duplicate</sub> = 10.7 mg/dL , SD<sub>week 1</sub> =12.4 mg/dL, SD<sub>week 2</sub> =11.6 mg/dL,  $p=0.38$ ) and  
25 Dexcom (SD<sub>duplicate</sub> = 11.1 mg/dL, SD<sub>week 1</sub> = 11.5 mg/dL, SD<sub>week 2</sub> =11.9 mg/dL,  $p=0.60$ ).

26 **Conclusions:** Individual postprandial CGM responses to duplicate meals were unreliable  
27 in adults without diabetes. Personalized diet advice based on CGM measurements in  
28 adults without diabetes requires more reliable methods involving aggregated repeated  
29 measurements.

30 This secondary analysis contains data from two trials registered at [clinicaltrials.gov](https://clinicaltrials.gov)  
31 (NCT03407053 and NCT03878108).

32 **Keywords:** continuous glucose monitor, CGM, glycemia, glucose variability,  
33 personalized nutrition, precision nutrition

## 34 **Introduction**

35 Postprandial glycemic responses to different foods as measured by continuous glucose  
36 monitors (CGM) are highly variable between individuals, with some people exhibiting  
37 large glycemic excursions in response to one food compared to another, whereas a  
38 different person might experience the opposite results (1, 2). Such observations provide  
39 the rationale for personalizing diet advice to minimize glycemia excursions by attempting  
40 to identify the foods that result in reliably low postprandial glucose in each person (2, 3).  
41 The fundamental assumption of precision dietary advice is that repeated glycemic  
42 responses to the same meal within an individual are much less variable than their  
43 responses to different meals. However, this assumption has not been rigorously tested.

44  
45 We investigated the reliability of within-subject postprandial CGM responses to duplicate  
46 ad libitum meals consumed ~1 week apart by 15 participants residing at the NIH Clinical  
47 Center Metabolic Clinical Research Unit during two inpatient controlled feeding studies  
48 whose primary results have been reported elsewhere (4, 5). Study participants were  
49 presented with three daily meals from 7-day rotating menus for two weeks each such that  
50 each meal was provided in duplicate. Duplicate meals were included from four distinct  
51 dietary patterns. One was a minimally processed plant-based, low-fat diet, another was  
52 a minimally processed animal-based very-low carbohydrate ketogenic diet. The  
53 remaining two patterns had moderate macronutrient compositions, but one was high in  
54 ultra-processed foods, while the other was rich in unprocessed foods.

## 55 **Methods**

56 We performed an exploratory analysis of data from two clinical research protocols  
57 approved by the institutional review board of the National Institute of Diabetes and  
58 Digestive and Kidney Diseases and are registered at clinicaltrials.gov (NCT03407053 and  
59 NCT03878108). Participants provided written informed consent and eligibility criteria for  
60 both studies were (1) ages 18–50 years; (2) body mass index  $>18.5$  kg/m<sup>2</sup>; and (3) weight  
61 stable ( $<5\%$  change in past 6 months). Both studies were within-subject, random-order  
62 crossover designs where participants were exposed to two diets for 14 days each on 7-  
63 day rotating menus, consuming each meal twice (once during week 1 and once during  
64 week 2). This enabled comparison of up to 21 repeated meals within each of the 4 dietary  
65 patterns. The daily menus had three meals (breakfast, lunch, and dinner), where the order  
66 within day was always fixed and the time of day when each meal was consumed was  
67 similar between the first and second week. Furthermore, the sequence of the daily menu  
68 was the same on the first and second week except in cases when the respiratory chamber  
69 day (whose menu was fixed within each diet pattern) had to be scheduled on a different  
70 day due to availability.

71  
72 Meals were provided to participants alone in their inpatient rooms and photographs of the  
73 meals have been published previously alongside the primary outcomes (4, 5).  
74 Participants were instructed eat as much or as little food as they wanted and asked to not  
75 intentionally change their weight throughout the study. All foods were weighed to the  
76 nearest 0.1 g before and after consumption, and energy intake was calculated using  
77 ProNutra software (v.3.4, Viocare). A limitation of these studies with respect to our

78 analyses of post-meal glycemic responses is that they included bottled water and snacks  
79 available throughout the day, but the timing of their consumption was not recorded.

80

81 Interstitial glucose concentrations were obtained from two brands of monitor: Abbott  
82 Freestyle Libre Pro (Abbott) and Dexcom G4 Platinum (Dexcom). In NCT03407053, some  
83 participants wore both Abbott and Dexcom, and in NCT03878108 study participants wore  
84 Dexcom. The Abbott device records glucose every 15 minutes and the Dexcom every 5  
85 minutes. For accurate postprandial analysis, only duplicate meals with measured start  
86 time and sufficient data availability were included. For Abbott the mean (range) of  
87 duplicate meals within-participant was 28 (11 to 34) from 14 participants providing 392  
88 total comparisons and for Dexcom the mean (range) of duplicate meals within-participant  
89 was 22 (2 to 49) from 30 participants providing 664 total comparisons. Data were aligned  
90 to the nearest 15-minute (Abbott) or 5-minute (Dexcom) CGM reading for calculation of  
91 post-meal responses. Baseline was assigned as the first time-point after the meal was  
92 provided. The 2-hour postprandial glucose incremental area under the curve (iAUC) was  
93 calculated for each meal using the trapezoid method, with dips below baseline assigned  
94 a negative value for iAUC (i.e., netAUC from (6)). Values of iAUC were reported as time-  
95 averaged glucose concentrations across the 2-h postprandial period.

96

97 Statistical analyses and data visualization were performed in R (v4.2.3) and GraphPad  
98 Prism (v9.5.0). Standard major axis regression was used to plot trends between meal 1  
99 and meal 2 using lmodel2 in R. Simple linear correlation was calculated using Pearson's  
100 correlation coefficient ( $r$ ), with  $<0.4$  interpreted as weak, 0.4 to 0.8 interpreted as

101 moderate, and >0.8 interpreted as strong correlation. Repeatability was estimated by  
102 calculating the intra-class correlation coefficient (ICC) for glucose iAUCs. ICC was  
103 calculated using the following formula: ICC = participant variance / (participant variance  
104 + residual variance), which was generated from a linear mixed effects model with  
105 participant and residual error as random effects and meal and eating occasion as fixed  
106 effects (7). ICC values below 0.5 are considered as indicating poor reliability between  
107 measures (8). Bland-Altman analyses were conducted accounting for multiple  
108 observations per individual (9).

109

110 To examine individual glycemic variability in response to duplicate meals as compared  
111 with different meals, we partitioned the total iAUC variance between diet pattern, meal  
112 type (breakfast, lunch, dinner), menu day, and duplicate meals between successive  
113 weeks to compute the standard deviation (SD) of duplicate iAUC responses as follows:

$$114 \quad SD_{duplicate} = \sqrt{\left[ \frac{\sum_{diet} \sum_{meal} \sum_{menu} \sum_{duplicate} (iAUC_{diet,meal,menu,duplicate} - \langle iAUC_{diet,meal,menu} \rangle)^2}{df} \right]}, \text{ where}$$

115 df is the degrees of freedom and  $\langle iAUC_{diet,meal,menu} \rangle$  is the average iAUC over duplicate  
116 meals. Similarly, we computed individual SDs of the iAUC responses to different meals  
117 on each week of 7-day rotating menus as follows:

$$118 \quad SD_{week} = \sqrt{\left[ \frac{\sum_{diet} \sum_{meal} \sum_{menu} (iAUC_{diet,meal,menu} - \langle iAUC_{diet,meal} \rangle)^2}{df} \right]}$$

119 where df is the degrees of freedom and  $\langle iAUC_{diet,meal} \rangle$  is the average iAUC over the 7-  
120 day week of menus. One-way ANOVA with Bonferroni correction was used to compare

121 SDs of week 1, week 2, and duplicate meal responses. Energy intake of meals in week 1  
122 and week 2 were compared using a paired t-test. Significance was accepted as  $p \leq 0.05$ .

123

124 During the inpatient stay of each study, venous glucose measurements were obtained  
125 during oral glucose tolerance tests (OGTTs) in both studies and mixed meal tolerance  
126 tests (MMTTs) in NCT03878108 (Dexcom only) whilst wearing CGMs. This allowed for  
127 an assessment of individual variability between simultaneously measured venous and  
128 CGM determined iAUCs in response to OGTTs and MMTTs to provide an index of how  
129 much of the CGM iAUC variability in response to duplicate meals might be due to  
130 variability in the iAUC determined by CGM as compared to simultaneous venous  
131 measurements. So, we evaluated the SD of the difference between CGM and venous  
132 iAUCs in response to the same meal test and compared this to the SD of the duplicate  
133 CGM iAUC responses.

134

135 To potentially identify predictors of individual variability in postprandial glucose response  
136 to duplicate meals, we used forward stepwise linear regression to estimate the  
137 contribution of measured behavioral variables using the stepAIC function of the R  
138 package `MASS`. The response variable was difference between duplicate meal  
139 postprandial glucose responses assessed as either iAUC or total area under the curve  
140 (tAUC). Predictor variables included differences in baseline blood glucose (for iAUC only),  
141 difference in time taken to consume the meals, number of days between meals, difference  
142 in energy intake from snack consumption, type of meal (breakfast, lunch, or dinner),  
143 difference in consumed meal-specific macronutrients energy (protein, fat, and



144 carbohydrate), presence of exercise  $\leq$  30 minutes before the start of a meal, and presence  
145 of exercise during the postprandial period. During the study, participants were instructed  
146 to complete three 20-minute light-to-moderate intensity exercise sessions on a bicycle  
147 ergometer with standardized wattage and speed (between 30-40% heart rate reserve).  
148 Meal duplicates with inaccurate meal or exercise timing were omitted from the regression  
149 analyses.

150

## 151 **Results**

### 152 **Glycemic responses to the same meals eaten on separate occasions are unreliable**

153 We investigated 30 participants whose characteristics are shown in **Table 1**, who were  
154 presented with duplicate meals on two consecutive weeks exactly 7 days apart for 85%  
155 of Abbott measurements and 63% of Dexcom measurements. **Figure 1A** plots the iAUC  
156 responses to meals consumed on week 2 versus the duplicate meals on week 1  
157 measured in the same participants using the Abbott device. **Figure 1B** plots analogous  
158 data obtained using the Dexcom device. Regardless of CGM, there were weak to  
159 moderate positive linear correlations between the within-subject iAUC responses to  
160 duplicate meals across all dietary patterns (Abbott  $r=0.47$ ,  $p<0.0001$ , Dexcom  $r=0.43$ ,  
161  $p<0.0001$ ). Linear correlations were similar when meals were split into breakfast, lunch,  
162 and dinner (Abbott breakfast  $r=0.41$ , lunch  $r=0.55$ , dinner  $r=0.44$ ; Dexcom breakfast  
163  $r=0.41$ , lunch  $r=0.43$ , dinner  $r=0.40$ , all  $p<0.0001$ ).

164

165 Intra-class correlation coefficients (ICCs) were 0.31 for Abbott and 0.14 for Dexcom,  
166 indicating that there was a low tendency for glucose responses to be similar in duplicate

167 meals in the same participant. Across all duplicate meals and subjects, Bland-Altman  
168 plots are shown in **Figures 1C** and **1D** indicating a low mean bias between iAUC  
169 responses to duplicate meals (Abbott 0.1 mg/dL, Dexcom -0.2 mg/dL), but there was a  
170 large variability indicated by the wide 95% limits of agreement (LoA) for both CGMs  
171 (Abbott -31.3 to 31.5 mg/dL, Dexcom -30.8 to 30.4 mg/dL).

172

173 **Supplemental Figure 1A** and **1B** plot the differences in glycemic responses to duplicate  
174 meals for each individual participant using the Abbott and Dexcom devices, respectively,  
175 and show highly variable glycemic responses when the same participant consumed  
176 duplicate meals on separate weeks, regardless of the CGM device. However, the iAUC  
177 bias was relatively low for most participants when averaged across different duplicate  
178 meals. **Supplemental Figure 1C** and **1D** plot the same data separated by individual  
179 duplicate meals as measured using the Abbott and Dexcom devices, respectively, and  
180 indicate highly variable individual glycemic responses to duplicate meals, regardless of  
181 the CGM device. Nevertheless, the iAUC bias was relatively low for most meals when  
182 averaged across participants.

183

184 **Similar individual glycemic response variability to duplicate versus different meals**

185 Surprisingly, we found that everyone's glycemic response variability to duplicate meals  
186 was similar to the variability in their glycemic responses to different meals. **Figure 2A**  
187 plots the SD of the glycemic responses in each individual participant to different meals  
188 eaten in either week 1 or week 2 along with the SD of their glycemic responses to  
189 duplicate meals for the Abbott device. **Figure 2B** plots analogous data from the Dexcom

190 device. Regardless of device, the variability in the glycemic response to duplicate meals  
191 was similar to each participant's glycemic response variability to different meals (Abbott:  
192  $SD_{\text{week 1}} = 12.4 \text{ mg/dL}$ ,  $SD_{\text{week 2}} = 11.6 \text{ mg/dL}$ ,  $SD_{\text{duplicate}} = 10.7 \text{ mg/dL}$ ,  $p=0.38$ ; Dexcom:  
193  $SD_{\text{week 1}} = 11.5 \text{ mg/dL}$ ,  $SD_{\text{week 2}} = 11.9 \text{ mg/dL}$ ,  $SD_{\text{duplicate}} = 11.1 \text{ mg/dL}$ ,  $p=0.60$ ).

194

### 195 **Comparing venous and CGM-derived interstitial glucose responses to oral glucose** 196 **and mixed meal tolerance tests**

197 Mean  $\pm$ SEM iAUC responses to OGTTs were similar between venous ( $39.5 \pm 3.8 \text{ mg/dL}$ )  
198 and Abbott CGM ( $39.5 \pm 3.9 \text{ mg/dL}$ ,  $p=0.99$ ; **Figure 3A**) and were moderately correlated  
199 ( $r=0.73$ ,  $p<0.0001$ ; **Figure 3B**). Mean  $\pm$ SEM iAUC responses to OGTTs and diet-specific  
200 MMTTs were similar between venous ( $38.1 \pm 2.8 \text{ mg/dL}$ ) and Dexcom CGM ( $36.8 \pm 2.9$   
201  $\text{mg/dL}$ ,  $p=0.53$ ; **Figure 3D**) and were also moderately correlated ( $r=0.72$ ,  $p<0.0001$ ;  
202 **Figure 3E**). Note that glycemic responses to very low carbohydrate meals were low for  
203 all participants. The SD of venous to CGM responses were not significantly different to  
204 duplicate meal SDs for Abbott ( $p=0.28$ ; **Figure 3C**) and even higher for Dexcom ( $p=0.01$ ;  
205 **Figure 3F**) suggesting that CGM imprecision of individual iAUC measurements  
206 contributes to the observed unreliable quantification of glycemic responses to meals.

207

### 208 **Potential factors affecting variability in glycemic response to duplicate meals**

209 We explored numerous factors that may have contributed to explaining the glycemic  
210 response variability to duplicate meals. Firstly, there was a moderate negative linear  
211 correlation between differences in baseline glucose and differences in iAUC (Abbott  $r=-$   
212  $0.42$   $p<0.0001$ , Dexcom  $r=-0.48$   $p<0.0001$ ), suggesting baseline glucose concentrations

213 may have contributed to the low repeatability of glucose iAUC. Repeating analyses with  
214 tAUC rather than incremental moderately increased ICC for both Abbott (0.57) and  
215 Dexcom (0.23).

216

217 Because food intake was ad libitum in our studies, we investigated whether differences  
218 in meal energy intake between duplicate meal weeks affected our findings. For Abbott,  
219 mean (95% CI) meal energy intake was 777 (746 to 808) kcal in week 1 and 744 (712 to  
220 777) kcal in week 2 ( $p=0.0007$ ). For Dexcom, mean (95% CI) meal energy intake was  
221 790 (761 to 819) kcal in week 1 and 770 (742 to 798) kcal in week 2 ( $p=0.02$ ). Energy  
222 intake between duplicate meals was strongly positively correlated (Abbott  $r=0.83$   
223  $p<0.0001$ , Dexcom  $r=0.83$   $p<0.0001$ ) and there was a weak positive correlation between  
224 differences in energy intake and differences in glucose iAUC (Abbott  $r=0.24$   $p<0.0001$ ,  
225 Dexcom  $r=0.13$   $p=0.008$ ). However, repeating our analyses using only duplicate meals  
226 where energy intake was within 100 kcal between meals did not materially affect our  
227 results regarding the iAUC correlations (Abbott  $n=201$ ,  $r=0.43$   $p<0.0001$ , Dexcom  $n=314$ ,  
228  $r=0.45$   $p<0.0001$ ), or ICC (Abbott 0.29, Dexcom 0.16), or Bland-Altman analyses (Abbott  
229 bias -0.5 mg/dL, LoA -31.9 to 30.9 mg/dL Dexcom bias -0.4 mg/dL, LoA -31.2 to 30.3  
230 mg/dL). Using only meals where energy intake was within 100 kcal, the variability in the  
231 glycemic response to duplicate meals remained similar to each participant's glycemic  
232 response variability to different meals (Abbott:  $SD_{\text{week 1}} = 12.4$  mg/dL,  $SD_{\text{week 2}} = 12.0$   
233 mg/dL,  $SD_{\text{duplicate}} = 10.7$  mg/dL,  $p=0.43$ ; Dexcom:  $SD_{\text{week 1}} = 12.9$  mg/dL,  $SD_{\text{week 2}} = 11.8$   
234 mg/dL,  $SD_{\text{duplicate}} = 11.4$  mg/dL,  $p=0.45$ ).

235

236 In addition to the three daily meals provided, participants were also given snacks that  
237 could be consumed at any time of day. To examine whether our results may have been  
238 affected by differences in snack intake between days with duplicate meals, we filtered the  
239 data such that snack intake was <200 kcal on both duplicate meal days resulting in 136  
240 duplicates meals available for Abbott and 245 for Dexcom. For Abbott, mean (95% CI)  
241 meal energy intake was 791 (738 to 845) kcal in week 1 and 748 (694 to 802) kcal in  
242 week 2 ( $p=0.008$ ) and mean (95%) snack intake was 39 (28 to 50) kcal/d in week 1 and  
243 32 (23 to 40) kcal/d in week 2 ( $p=0.31$ ). For Dexcom, mean (95% CI) meal energy intake  
244 was 720 (675 to 765) kcal in week 1 and 709 (667 to 752) kcal in week 2 ( $p=0.34$ ) and  
245 mean (95%) snack intake was 29 (22 to 37) kcal/d in week 1 and 20 (14 to 25) kcal/d in  
246 week 2 ( $p=0.02$ ). Repeating our analyses using only meals where snack intake was less  
247 than 200 kcal did not materially affect our results regarding the iAUC correlations (Abbott  
248  $r=0.59$   $p<0.0001$ , Dexcom  $r=0.48$   $p<0.0001$ ), or ICC (Abbott 0.34, Dexcom 0.19), or  
249 Bland-Altman analyses (Abbott bias 0.4 mg/dL, LoA -27.3 to 28.2 mg/dL; Dexcom bias  
250 1.2 mg/dL, LoA -29.5 to 31.8 mg/dL). Using only meals where daily snack intake was less  
251 than 200 kcal, the variability in the glycemic response to duplicate meals remained similar  
252 to each participant's glycemic response variability to different meals (Abbott:  $SD_{\text{week 1}} =$   
253  $11.3$  mg/dL,  $SD_{\text{week 2}} = 10.2$  mg/dL,  $SD_{\text{duplicate}} = 8.8$  mg/dL,  $p=0.30$ ; Dexcom:  $SD_{\text{week 1}} =$   
254  $10.9$  mg/dL,  $SD_{\text{week 2}} = 9.5$  mg/dL,  $SD_{\text{duplicate}} = 10.4$  mg/dL,  $p=0.43$ ).

255

256 **Explaining variance in response to duplicate meals using known behavioral**  
257 **variables**

258 For Abbott, the difference in baseline glucose, carbohydrate content of meals, energy  
259 intake from consumption of snacks, and the time taken to consume meals were identified  
260 as predictor variables for the difference in iAUC between duplicate meals (**Table 2**). For  
261 tAUC, predictor variables were the difference in carbohydrate content and energy intake  
262 from snacks (**Table 2**). For Dexcom, the difference in baseline glucose, difference in  
263 carbohydrate content of meals, postprandial exercise occurring only in meal 1,  
264 postprandial exercise occurring only in meal 2, and difference in time to consume meals  
265 were identified as predictor variables for the difference in iAUC between duplicate meals  
266 (**Table 3**. For tAUC, the difference in carbohydrate content, presence of postprandial  
267 exercise only in meal 1, presence of postprandial exercise only in meal 2, and difference  
268 in energy intake from snacks were identified as predictor variables (**Table 3**). While these  
269 identified predictor variables significantly contributed to individual variability in  
270 postprandial glucose responses to duplicate meals, they explained only a small amount  
271 ( $\leq 25\%$ ) of the variability as determined by the coefficients of determination ( $R^2$ ) values in  
272 the resulting linear regression models (Tables 2 and 3).

273

### 274 **Implications for Meal Ranking**

275 Given the low reliability of iAUC responses, advice to eat meals having low postprandial  
276 glucose responses (i.e., bottom tertile) based on a single meal test does not necessarily  
277 result in low glycemic excursions in response to the same meals in the future.

278 **Supplemental Figure 2** shows that meals in the bottom iAUC tertile on week 1 were 93%  
279 and 123% lower than the mean across all meals for Abbott and Dexcom, respectively.  
280 However, the same meals on week 2 were only 48% and 49% lower than average.

281 Conversely, **Supplemental Figure 2** also shows that advice to avoid meals with elevated  
282 iAUC, in week 1 shows the inverse. Meals in the upper iAUC tertile on week 1 were 99%  
283 and 132% higher than the mean across all meals for Abbott and Dexcom, respectively.  
284 However, the same meals on week 2 were only 59% and 60% higher than average,  
285 suggesting regression to the mean with repeated measures.

286

## 287 **Discussion**

288 CGM devices are becoming widely used in people without diabetes as part of commercial  
289 precision nutrition programs that provide personalized diet advice (10), however, CGM  
290 responses need to be precise and accurate to be useful (11). The fundamental  
291 assumption of personalized or “precision” nutrition is that an individual’s responses to  
292 repeated meals are less variable than their responses to different meals. Otherwise, it  
293 would be impossible to provide reliable advice to avoid meals that result in poor  
294 responses. Previous work found relatively reliable postprandial CGM responses to a small  
295 number of duplicate simple meals like bread (2) or muffins (1), but such meals are not  
296 representative of multicomponent meals that are the focus of personalized dietary advice  
297 in the real-world. Surprisingly, our study found that the reliability of postprandial CGM  
298 responses to many duplicate multicomponent meals was poor and that the within-subject  
299 variability to duplicate meals was roughly as large as the variability across different meals.  
300 Perhaps this is why recent randomized trials comparing personalized nutrition  
301 interventions focused on glycemic responses observed small effects for mean glucose  
302 (within 7 mg/dL, 0.39 mmol/L) and HbA1c (within 0.14%) (12), or no differences in  
303 glycemic variability and HbA1c (13) as compared to general diet advice.

304

305 We recently demonstrated that postprandial glycemc responses using two different  
306 brands of CGMs simultaneously worn on different anatomical locations resulted in only  
307 moderate correlations of within-subject postprandial responses to simultaneously  
308 measured multicomponent meals ( $r=0.68$ ) and modest concordance of the meal rankings  
309 by iAUC (Kendal rank correlation = 0.43) (14). A subsequent study using simple test  
310 meals (i.e., muffins, milkshakes, and energy bars) confirmed that simultaneous within-  
311 subject postprandial iAUCs measured using different CGM devices were only moderately  
312 correlated ( $r=0.61$ ) but the rank order of these simple meals according to iAUC was more  
313 concordant (Kendall rank correlation = 0.68) than the rankings of multicomponent meals  
314 in our previous study, perhaps reflecting the formulation of simple test foods to have wide  
315 differences in glycemc load (15). Interestingly, using identical CGMs in the same  
316 anatomical location resulted in much better agreement ( $r=0.97$ ; Kendall rank correlation  
317 = 0.87) suggesting that a given CGM device provides valid measures of postprandial  
318 glycemc responses to simple test meals on a single occasion (15). However, this does  
319 not address the reliability of within-subject responses to repeated meals.

320

321 The relatively low within-subject reliability of postprandial CGM responses to duplicate  
322 multicomponent meals in our study occurred under highly controlled metabolic ward  
323 conditions where meal order within each day was standardized and was typically  
324 preceded by a previous standardized day. Whilst less reflective of free-living conditions,  
325 such inpatient controlled feeding studies reduce the amount of variability explained by  
326 behavioral factors, enabling better understanding of the amount of glycemc variability



327 that can be explained by ingestion of meals, providing a better indication of measurement  
328 error (16, 17). However, despite the strengths of our inpatient controlled feeding design,  
329 our study had several limitations. First, the primary aims of the original studies were to  
330 measure ad libitum energy intake differences between dietary patterns, therefore  
331 duplicate meals were not necessarily consumed in identical amounts, although energy  
332 intake of duplicate meals was highly correlated and repeating the analyses using only  
333 meals within 100 kcal of each other did not change interpretation. Furthermore, despite  
334 the regimented meal order and timing achieved with implementation of the 7-day rotating  
335 menus, snacks were available for consumption at any time of day which may have  
336 differentially affected meal responses. Re-analysis using only duplicate meals on days  
337 when snack intake was below 200 kcal or when the energy intake difference between  
338 duplicate meals was <100 kcal did not materially affect our results.

339  
340 The two strongest predictor variables of postprandial glucose differences in response to  
341 duplicate meals were differences in baseline glucose and carbohydrates consumed.  
342 Interestingly, the impact of exercise on postprandial glucose responses was only  
343 identified using Dexcom and not Abbott. The presence of a 20-minute bout of light-to-  
344 moderate intensity exercise during the postprandial period decreased glucose responses  
345 in the Dexcom, similar to previous findings (18). The discrepancy between CGMs could  
346 be due to the anatomical location of the monitors in proximity to physically active tissue  
347 (19), and increased subcutaneous adipose tissue blood flow (20). In our previous  
348 analysis, the discrepancy between Abbott (arm) and Dexcom (abdomen) was larger in  
349 individuals with higher body fat (14). Regardless of CGM, the variation in postprandial

350 glucose excursions to duplicate meals was only weakly correlated with the measured  
351 predictor variables thought to influence glucose responses in our regression model. This  
352 suggests it would be very difficult to explain the variance in CGM response between  
353 duplicate meals by collecting data on behavior in a free-living setting.

354

355 Repeating analyses with tAUC rather than iAUC modestly improved reliability for both  
356 Abbott and Dexcom. The moderate reliability of Abbott was similar to reliability previously  
357 reported for 4-h glucose tAUCs using venous samples from duplicate mixed meals,  
358 performed under standardized conditions twice within 28 days in adults with normal  
359 glucose tolerance (21), but ICC for Dexcom was still much lower when using tAUC.

360

361 Due to the inpatient setting, our study has limited generalizability to free-living people.  
362 However, free-living behaviors will likely further increase the within-subject variability of  
363 CGM responses to similar meals. A plethora of modifiable behavioral factors can also  
364 influence postprandial glycemic responses to the same meal within an individual and the  
365 reasons for the variable responses to repeated meals in our study are presently unknown.  
366 In our study, meals were ad libitum, but participants tended to eat similar amounts of the  
367 repeated meals and differences in energy intake did not seem to account for the  
368 differences in glycemic response, as the variability was similar when only analyzing meals  
369 with similar energy intake within 100 kcal (data not shown). However, variations in the  
370 sequence of foods consumed within the repeated multicomponent ad libitum meals may  
371 have contributed to the variability because food sequence has been previously shown to  
372 result in varying glycemic responses in people with and without type 2 diabetes (22-25).

373 Physical activity differences may have also played a role, as previous studies have shown  
374 that breaking up prolonged sitting with small amounts of physical activity during the  
375 postprandial period reduces postprandial glycemia (26-28), and even leg fidgeting may  
376 have an effect (29). Sleep quality and bedtime has recently been associated with changes  
377 in CGM-derived measures of postprandial glucose (30), so variations in sleep quality may  
378 have contributed to differences in the studies presented. Importantly, if such behavioral  
379 factors are indeed important contributors to meal glycemetic responses, then an enormous  
380 amount of data may be required to capture these behavioral determinants and reliably  
381 predict an individual's glucose excursions and thereby provide personalized "precision"  
382 diet advice.

383  
384 Participants wore CGMs during standardized meal tests (either OGTTs or diet-specific  
385 MMTTs) concurrent with venous blood measures to provide some indication of the  
386 contribution of technical error to the observed variable postprandial responses,  
387 acknowledging there is a 5-6 minute lag time for glucose moving from intravascular to  
388 interstitial compartments (31). The correlation between venous and CGM was responses  
389 were similar to values recently reported, but we did not observe a mean difference  
390 between CGM and venous iAUCs, compared to the ~20.5 mg/dL (~1.14 mmol/L) mean  
391 difference that was reported recently (32). The SD of venous to CGM responses were not  
392 different to duplicate meal SDs for Abbott and were higher for Dexcom, suggesting that  
393 the variance between CGM and venous measures was at least as high as the variance  
394 of duplicate meals within CGM. However, there were fewer pairs to calculate SD with the  
395 venous to CGM comparisons versus the within CGM comparison of duplicate meals and

396 perhaps more repeated measures are required to reliably compare the variance between  
397 CGM and venous measures within each participant.

398

399 Our participants were representative of a generally healthy population across a wide  
400 range of body mass indexes, but without diabetes or other metabolic disease. Recent  
401 cross-sectional evidence using Medtronic devices suggests day-to-day reproducibility of  
402 CGM readings is lower in younger individuals (< 60 years) without prediabetes or type 2  
403 diabetes (33). Intriguingly, we found a low mean bias of within-subject iAUCs in response  
404 to multiple pairs of duplicate meals suggesting that it may be possible to reliably estimate  
405 within-subject postprandial responses to the same meals provided that enough repeated  
406 measurements are made. Identifying the number of repeated postprandial CGM  
407 measurements, in response to the same meals within-participants, that is required to  
408 provide reliable personalized estimates, is a critical question for future research. Our  
409 results suggest that two measurements are too few even under highly standardized  
410 metabolic ward conditions.

411

412 In conclusion, our data suggest that personalized diet advice is unlikely to be reliable if it  
413 is based primarily on postprandial CGM measurements obtained using very few repeated  
414 measurements in adults without diabetes. Instead, precision nutrition requires more  
415 reliable methods involving aggregated repeated measurements.

416 **Acknowledgements**

417 This work was supported by the Intramural Research Program of the NIH, National  
418 Institute of Diabetes & Digestive & Kidney Diseases under award number 1ZIADK013037.  
419 We thank the nursing and nutrition staff at the NIH Metabolic Clinical Research Unit for  
420 their invaluable assistance with this study. We thank the study participants for their  
421 invaluable contribution.

422

423 **Author contributions**

424 JG and KDH conceptualized and designed the research, AH, JAO, KM, JG, and KDH  
425 analyzed and interpreted the data, and critically reviewed, drafted, and approved the final  
426 manuscript.

427

428 **Conflict of interest**

429 The authors report no conflicts of interest.

## References

1. Berry SE, Valdes AM, Drew DA, Asnicar F, Mazidi M, Wolf J, et al. Human postprandial responses to food and potential for precision nutrition. *Nat Med*. 2020;26(6):964-73. doi: 10.1038/s41591-020-0934-0.
2. Zeevi D, Korem T, Zmora N, Israeli D, Rothschild D, Weinberger A, et al. Personalized Nutrition by Prediction of Glycemic Responses. *Cell*. 2015;163(5):1079-94. doi: 10.1016/j.cell.2015.11.001.
3. Mendes-Soares H, Raveh-Sadka T, Azulay S, Edens K, Ben-Shlomo Y, Cohen Y, et al. Assessment of a Personalized Approach to Predicting Postprandial Glycemic Responses to Food Among Individuals Without Diabetes. *JAMA Netw Open*. 2019;2(2):e188102. doi: 10.1001/jamanetworkopen.2018.8102.
4. Hall KD, Ayuketah A, Brychta R, Cai HY, Cassimatis T, Chen KY, et al. Ultra-Processed Diets Cause Excess Calorie Intake and Weight Gain: An Inpatient Randomized Controlled Trial of Ad Libitum Food Intake (vol 30, pg 67, 2019). *Cell Metabolism*. 2019;30(1):226-. doi: 10.1016/j.cmet.2019.05.020.
5. Hall KD, Guo J, Courville AB, Boring J, Brychta R, Chen KY, et al. Effect of a plant-based, low-fat diet versus an animal-based, ketogenic diet on ad libitum energy intake. *Nat Med*. 2021;27(2):344-53. doi: 10.1038/s41591-020-01209-1.
6. Wolever TM. Effect of blood sampling schedule and method of calculating the area under the curve on validity and precision of glycaemic index values. *The British journal of nutrition*. 2004;91(2):295-301. doi: 10.1079/bjn20031054.
7. Bates D, Machler M, Bolker BM, Walker SC. Fitting Linear Mixed-Effects Models Using lme4. *J Stat Softw*. 2015;67(1):1-48. doi: DOI 10.18637/jss.v067.i01.
8. Koo TK, Li MY. A Guideline of Selecting and Reporting Intraclass Correlation Coefficients for Reliability Research. *J Chiropr Med*. 2016;15(2):155-63. doi: 10.1016/j.jcm.2016.02.012.
9. Bland JM, Altman DG. Agreement between methods of measurement with multiple observations per individual. *J Biopharm Stat*. 2007;17(4):571-82. doi: 10.1080/10543400701329422.
10. Jaklevic MC. Start-ups Tout Continuous Glucose Monitoring for People Without Diabetes. *JAMA*. 2021;325(21):2140-2. doi: 10.1001/jama.2021.3789.
11. Betts JA, Gonzalez JT. Personalised nutrition: What makes you so special? *Nutr Bull*. 2016;41(4):353-9. doi: 10.1111/nbu.12238.
12. Ben-Yacov O, Godneva A, Rein M, Shilo S, Kolobkov D, Koren N, et al. Personalized Postprandial Glucose Response-Targeting Diet Versus Mediterranean Diet for Glycemic Control in Prediabetes. *Diabetes care*. 2021;44(9):1980-91. doi: 10.2337/dc21-0162.
13. Kharmats AY, Popp C, Hu L, Berube L, Curran M, Wang C, et al. A randomized clinical trial comparing low-fat with precision nutrition-based diets for weight loss: impact on glycemic variability and HbA1c. *Am J Clin Nutr*. 2023. doi: 10.1016/j.ajcnut.2023.05.026.
14. Howard R, Guo J, Hall KD. Imprecision nutrition? Different simultaneous continuous glucose monitors provide discordant meal rankings for incremental postprandial glucose in subjects without diabetes. *Am J Clin Nutr*. 2020;112(4):1114-9. doi: 10.1093/ajcn/nqaa198.

15. Merino J, Linenberg I, Bermingham KM, Ganesh S, Bakker E, Delahanty LM, et al. Validity of continuous glucose monitoring for categorizing glycemic responses to diet: implications for use in personalized nutrition. *Am J Clin Nutr.* 2022;115(6):1569-76. doi: 10.1093/ajcn/nqac026.
16. Hall KD. Challenges of human nutrition research. *Science.* 2020;367(6484):1298-300. doi: 10.1126/science.aba3807.
17. Hall KD, Heymsfield SB, Kemnitz JW, Klein S, Schoeller DA, Speakman JR. Energy balance and its components: implications for body weight regulation. *Am J Clin Nutr.* 2012;95(4):989-94. doi: 10.3945/ajcn.112.036350.
18. Solomon TPJ, Tarry E, Hudson CO, Fitt AI, Laye MJ. Immediate post-breakfast physical activity improves interstitial postprandial glycemia: a comparison of different activity-meal timings. *Pflugers Arch.* 2020;472(2):271-80. doi: 10.1007/s00424-019-02300-4.
19. Coates AM, Cohen JN, Burr JF. Investigating sensor location on the effectiveness of continuous glucose monitoring during exercise in a non-diabetic population. *Eur J Sport Sci.* 2023;23(10):2109-17. doi: 10.1080/17461391.2023.2174452.
20. Arner P, Kriegholm E, Engfeldt P, Bolinder J. Adrenergic regulation of lipolysis in situ at rest and during exercise. *The Journal of clinical investigation.* 1990;85(3):893-8. doi: 10.1172/JCI114516.
21. Shankar SS, Vella A, Raymond RH, Staten MA, Calle RA, Bergman RN, et al. Standardized Mixed-Meal Tolerance and Arginine Stimulation Tests Provide Reproducible and Complementary Measures of beta-Cell Function: Results From the Foundation for the National Institutes of Health Biomarkers Consortium Investigative Series. *Diabetes care.* 2016;39(9):1602-13. doi: 10.2337/dc15-0931.
22. Shukla AP, Andono J, Touhamy SH, Casper A, Iliescu RG, Mauer E, Shan Zhu Y, Ludwig DS, Aronne LJ. Carbohydrate-last meal pattern lowers postprandial glucose and insulin excursions in type 2 diabetes. *BMJ Open Diabetes Res Care.* 2017;5(1):e000440. doi: 10.1136/bmjdr-2017-000440.
23. Shukla AP, Dickison M, Coughlin N, Karan A, Mauer E, Truong W, et al. The impact of food order on postprandial glycaemic excursions in prediabetes. *Diabetes Obes Metab.* 2019;21(2):377-81. doi: 10.1111/dom.13503.
24. Shukla AP, Iliescu RG, Thomas CE, Aronne LJ. Food Order Has a Significant Impact on Postprandial Glucose and Insulin Levels. *Diabetes care.* 2015;38(7):e98-e9. doi: 10.2337/dc15-0429.
25. Trico D, Filice E, Trifiro S, Natali A. Manipulating the sequence of food ingestion improves glycemic control in type 2 diabetic patients under free-living conditions. *Nutr Diabetes.* 2016;6(8):e226. doi: 10.1038/nutd.2016.33.
26. Chen YC, Betts JA, Walhin JP, Thompson D. Adipose Tissue Responses to Breaking Sitting in Men and Women with Central Adiposity. *Medicine and science in sports and exercise.* 2018;50(10):2049-57. doi: 10.1249/MSS.0000000000001654.
27. Dunstan DW, Kingwell BA, Larsen R, Healy GN, Cerin E, Hamilton MT, et al. Breaking up prolonged sitting reduces postprandial glucose and insulin responses. *Diabetes care.* 2012;35(5):976-83. doi: 10.2337/dc11-1931.
28. Peddie MC, Bone JL, Rehrer NJ, Skeaff CM, Gray AR, Perry TL. Breaking prolonged sitting reduces postprandial glycemia in healthy, normal-weight adults: a randomized crossover trial. *Am J Clin Nutr.* 2013;98(2):358-66. doi: 10.3945/ajcn.112.051763.

29. Pettit-Mee RJ, Ready ST, Padilla J, Kanaley JA. Leg Fidgeting During Prolonged Sitting Improves Postprandial Glycemic Control in People with Obesity. *Obesity*. 2021;29(7):1146-54. doi: 10.1002/oby.23173.
30. Tsereteli N, Vallat R, Fernandez-Tajes J, Delahanty LM, Ordovas JM, Drew DA, et al. Impact of insufficient sleep on dysregulated blood glucose control under standardised meal conditions. *Diabetologia*. 2022;65(2):356-65. doi: 10.1007/s00125-021-05608-y.
31. Basu A, Dube S, Slama M, Errazuriz I, Amezcua JC, Kudva YC, Peyser T, Carter RE, Cobelli C, Basu R. Time lag of glucose from intravascular to interstitial compartment in humans. *Diabetes*. 2013;62(12):4083-7. doi: 10.2337/db13-1132.
32. Jin Z, Thackray AE, King JA, Deighton K, Davies MJ, Stensel DJ. Analytical Performance of the Factory-Calibrated Flash Glucose Monitoring System FreeStyle Libre2(TM) in Healthy Women. *Sensors (Basel)*. 2023;23(17). doi: 10.3390/s23177417.
33. Matabuena M, Pazos-Couselo M, Alonso-Sampedro M, Fernandez-Merino C, Gonzalez-Quintela A, Gude F. Reproducibility of continuous glucose monitoring results under real-life conditions in an adult population: a functional data analysis. *Sci Rep*. 2023;13(1):13987. doi: 10.1038/s41598-023-40949-1.



## Tables

**Table 1.** Baseline characteristics of participants included in analyses.

|                                      | Abbott<br>(n=14) | Dexcom<br>(n=30) |
|--------------------------------------|------------------|------------------|
| Sex (F,M)                            | F=8, M=6         | F=15, M=15       |
| Age (y)                              | 31 $\pm$ 8       | 30 $\pm$ 7       |
| Body mass (kg)                       | 73.0 $\pm$ 13.3  | 80.6 $\pm$ 19.4  |
| Body mass index (kg/m <sup>2</sup> ) | 25.5 $\pm$ 5.2   | 27.6 $\pm$ 6.3   |
| Body fat (%)                         | 28.9 $\pm$ 11.1  | 31.9 $\pm$ 9.9   |

Data mean  $\pm$ SD.

**Table 2.** Forward stepwise linear regression of incremental (iAUC) and total area under the curve (tAUC) interstitial glucose responses to duplicate meals eaten on separate days using Abbott continuous glucose monitors (CGMs).

| <i>Variable</i>                            | <b>Difference in iAUC<br/>(mg/dL)</b> |                   |                  | <b>Difference in tAUC<br/>(mg/dL)</b> |                   |                |
|--------------------------------------------|---------------------------------------|-------------------|------------------|---------------------------------------|-------------------|----------------|
|                                            | <i>Coefficient</i>                    | <i>Std. Error</i> | <i>P-Value</i>   | <i>Coefficient</i>                    | <i>Std. Error</i> | <i>P-Value</i> |
| (Intercept)                                | -0.46                                 | 0.80              | <u>0.568</u>     | -0.80                                 | 0.94              | 0.394          |
| Difference in Baseline Glucose (mg/dL)     | -0.42                                 | 0.05              | <b>&lt;0.001</b> |                                       |                   |                |
| Difference in Carbohydrate Consumed (kcal) | 0.04                                  | 0.01              | <b>&lt;0.001</b> | 0.02                                  | 0.01              | <b>0.013</b>   |
| Difference in Snack Energy Intake (kcal)   | -0.01                                 | 0.00              | <b>0.002</b>     | -0.01                                 | 0.00              | <b>0.006</b>   |
| Difference in Time to Consume Meal (min)   | -0.13                                 | 0.06              | <b>0.030</b>     |                                       |                   |                |
| Observations                               | 333                                   |                   |                  | 333                                   |                   |                |
| R <sup>2</sup> / R <sup>2</sup> adjusted   | 0.247 / 0.238                         |                   |                  | 0.040 / 0.034                         |                   |                |

**Table 3.** Forward stepwise linear regression of incremental (iAUC) and total area under the curve (tAUC) interstitial glucose responses to duplicate meals eaten on separate days using Dexcom continuous glucose monitors (CGMs).

| <i>Variable</i>                            | <b>Difference in iAUC<br/>(mg/dL)</b> |                   |                  | <b>Difference in tAUC<br/>(mg/dL)</b> |                   |                |
|--------------------------------------------|---------------------------------------|-------------------|------------------|---------------------------------------|-------------------|----------------|
|                                            | <i>Coefficient</i>                    | <i>Std. Error</i> | <i>P-Value</i>   | <i>Coefficient</i>                    | <i>Std. Error</i> | <i>P-Value</i> |
| (Intercept)                                | 1.16                                  | 0.69              | 0.094            | 2.15                                  | 0.88              | <b>0.015</b>   |
| Difference in Baseline Glucose (mg/dL)     | -0.40                                 | 0.03              | <b>&lt;0.001</b> |                                       |                   |                |
| Difference in Carbohydrate Consumed (kcal) | 0.02                                  | 0.01              | <b>&lt;0.001</b> | 0.02                                  | 0.01              | <b>0.010</b>   |
| Meal 1 Postprandial Exercise (Y/N)         | -4.05                                 | 1.59              | <b>0.011</b>     | -3.73                                 | 2.02              | 0.065          |
| Meal 2 Postprandial Exercise (Y/N)         | 0.26                                  | 1.50              | 0.864            | 2.03                                  | 1.89              | 0.285          |
| Difference in Time to Consume Meal (min)   | -0.08                                 | 0.05              | 0.117            |                                       |                   |                |
| Difference in Snack Energy Intake (kcal)   |                                       |                   |                  | 0.01                                  | 0.00              | <b>0.010</b>   |
| Observations                               | 580                                   |                   |                  | 580                                   |                   |                |
| R <sup>2</sup> / R <sup>2</sup> adjusted   | 0.250 / 0.243                         |                   |                  | 0.029 / 0.023                         |                   |                |

## Figures

**Figure 1.** Comparison of incremental area under the curve (iAUC) of postprandial glucose responses to duplicate meals using A) Abbott and B) Dexcom continuous glucose monitors. Trendline is major axis regression with 97.5% CIs. Bland-Altman plots of the iAUC differences between duplicate meals versus the average of both measurements using C) Abbott and D) Dexcom devices. Solid line indicates mean bias and dashed lines indicate 95% limits of agreement.

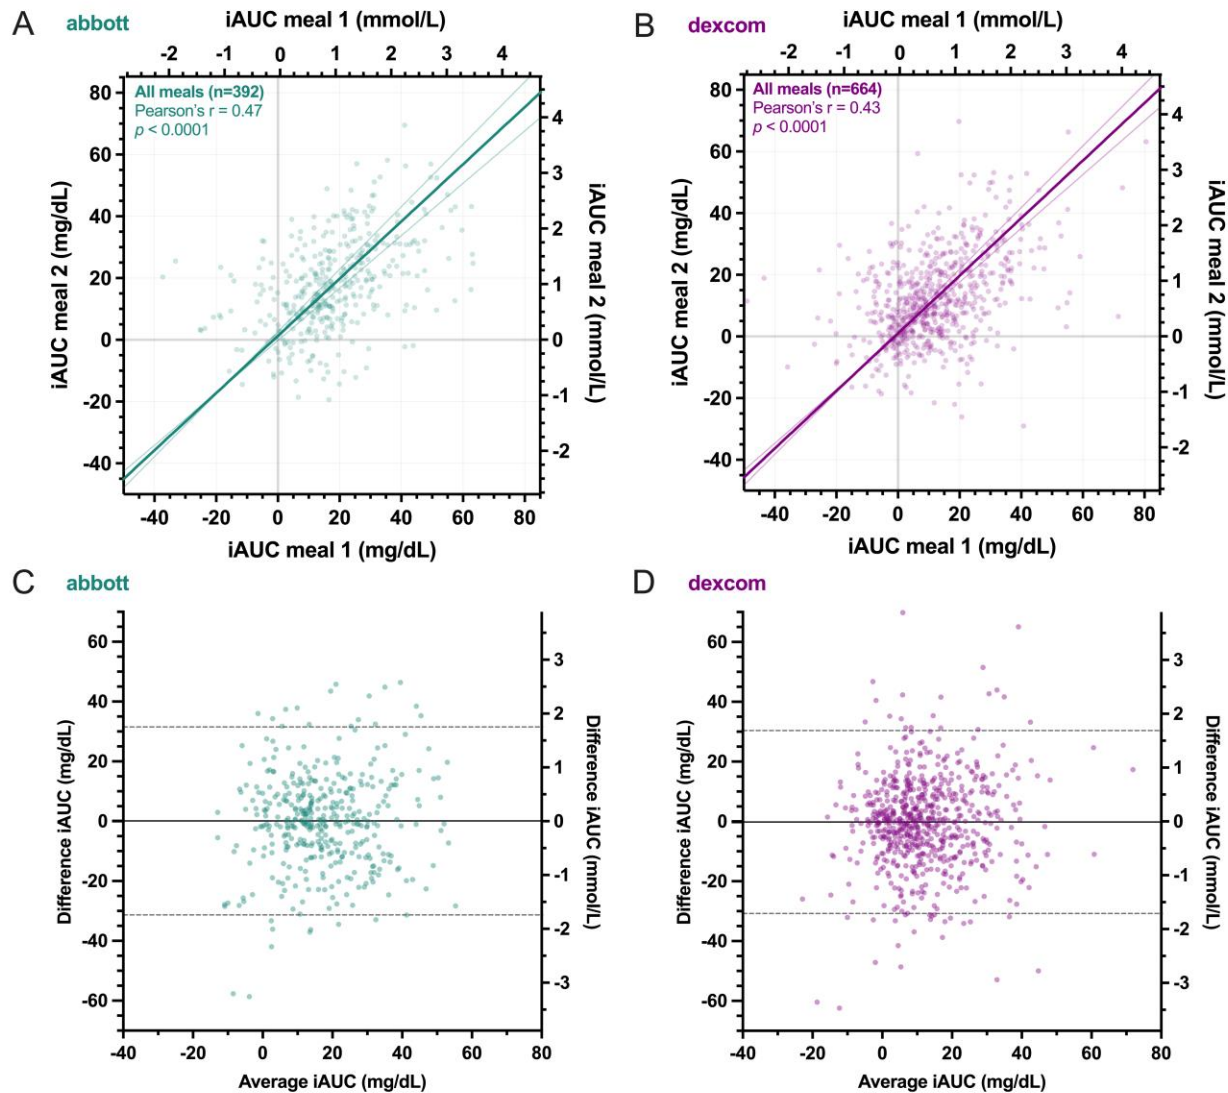

**Figure 2.** Mean and individual participant standard deviations (SD) of postprandial glucose responses between different meals across week 1, different meals across week 2, and duplicate meals between weeks using A) Abbott and B) Dexcom devices.

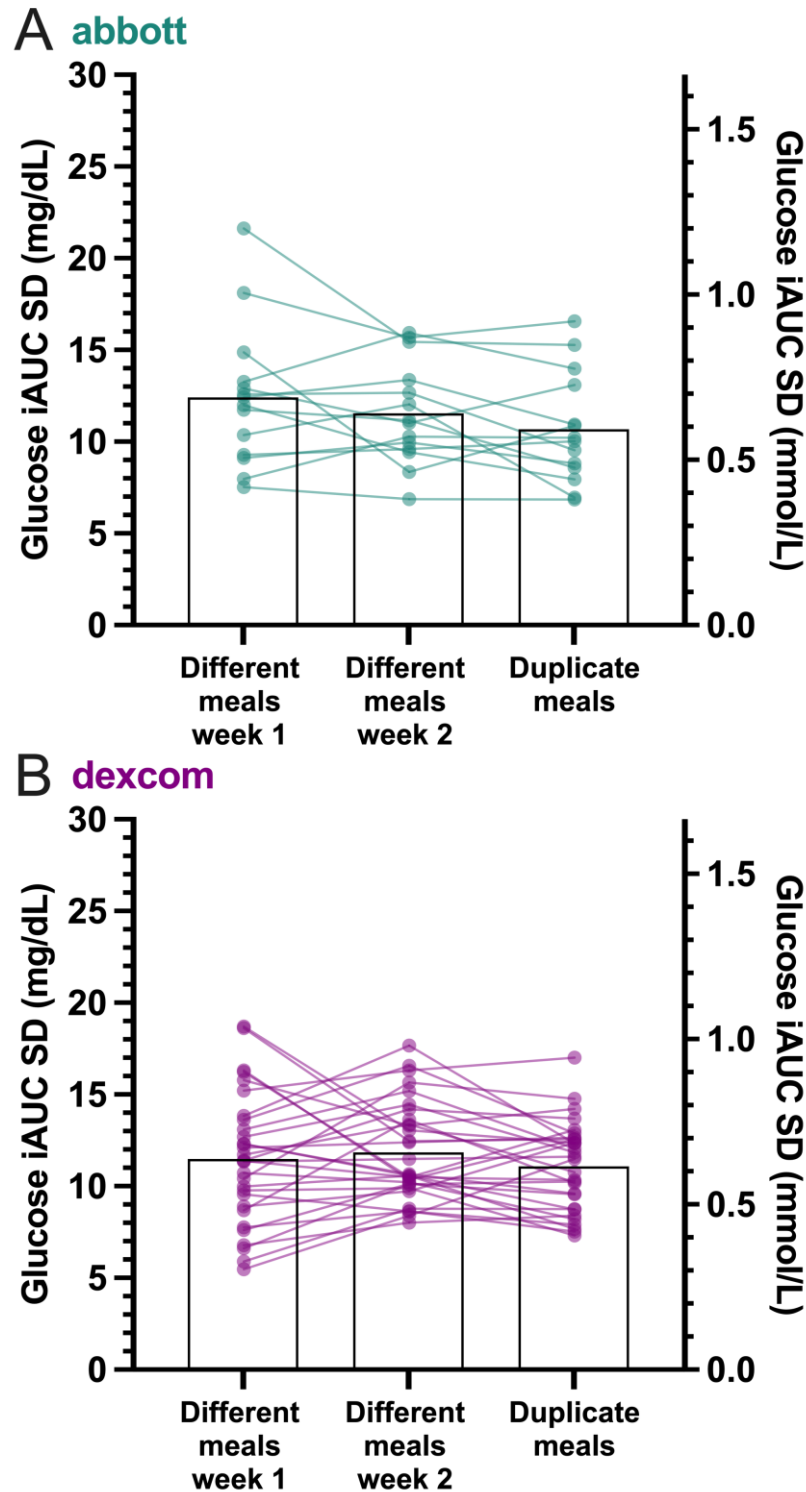

**Figure 3.** Mean  $\pm$ SEM and individual participant comparisons of venous incremental area under the curve (iAUC) responses to A) oral glucose tolerance tests (OGTTs) with Abbott (n=26), and D) OGTTs and mixed meal tolerance tests (MMTT) with Dexcom (n=87). Linear regression of B) Abbott and E) Dexcom iAUC (Pearson's r). Individual participant standard deviations (SD) of postprandial glucose responses to duplicate meals using CGM and venous to CGM comparisons for C) Abbott and F) Dexcom. Paired t-tests used for A,C,D,F.

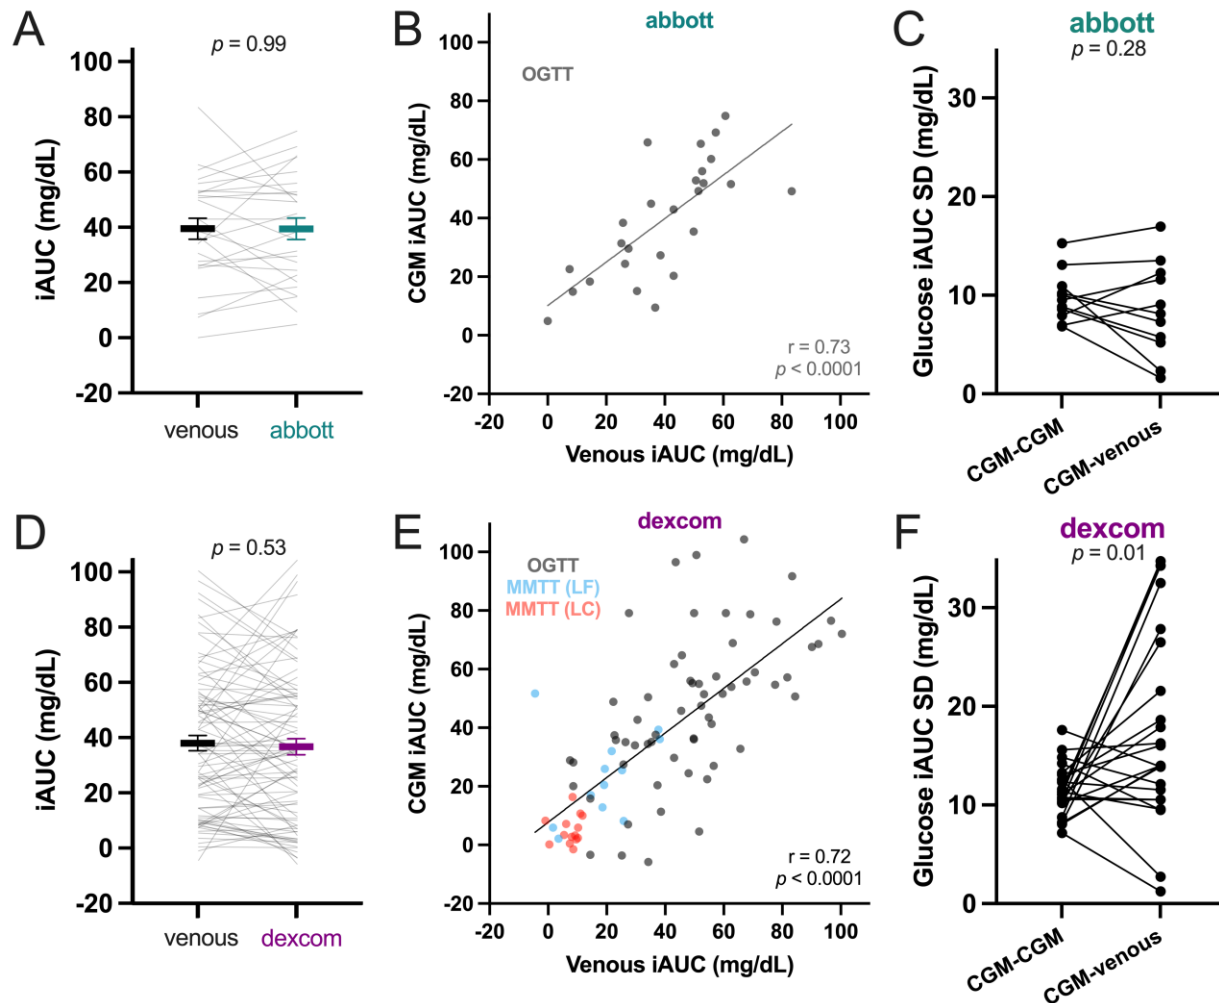

## Imprecision nutrition? Duplicate meals result in unreliable individual glycemic responses measured by continuous glucose monitors across four dietary patterns in adults without diabetes

Aaron Hengist<sup>1</sup>, Jude Ong<sup>1</sup>, Katherine McNeel<sup>1</sup>, Juen Guo<sup>1</sup>, Kevin D Hall<sup>1\*</sup>

### Supplemental Figures

**Supplemental Figure 1.** Mean  $\pm$ SD difference and individual comparisons of duplicate meals organized by participant using A) Abbott and B) Dexcom devices. Each data point is the within-participant iAUC difference between duplicate meals. Mean  $\pm$ SD and individual comparisons of duplicate meals ordered by meal pairing (across all participants) using C) Abbott and D) Dexcom CGMs. Each data point is a duplicate meal eaten in week 2 minus the same meal eaten in week 1 with data from all participants who consumed that meal (abbott has 42 total meals for comparison across the 14 days of rotating menu, 14 days x 3 meals; dexcom has 63 total meals for comparison across 21 days of rotating menu, 21 days x 3 meals).

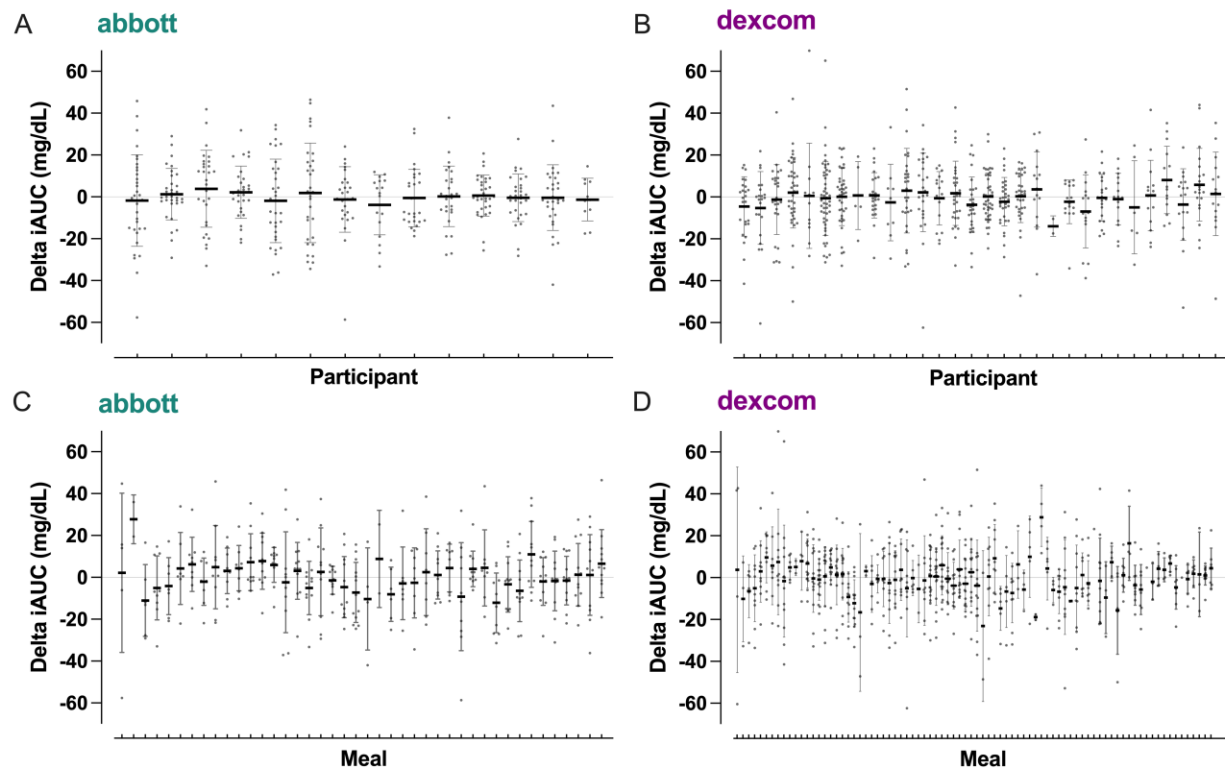

## Online Supplemental File

**Supplemental Figure 2.** Mean and individual meal responses from lower tertile and upper tertile meals during week 1 and the corresponding comparisons in week 2. Lower tertile meals were significantly higher in week 2 for Abbott (A) and Dexcom (C) and upper tertile meals were significantly lower in week 2 for Abbott (B) and Dexcom (D). Dashed lines are mean of all presented meal responses across 2 weeks. iAUC = incremental area under the curve.

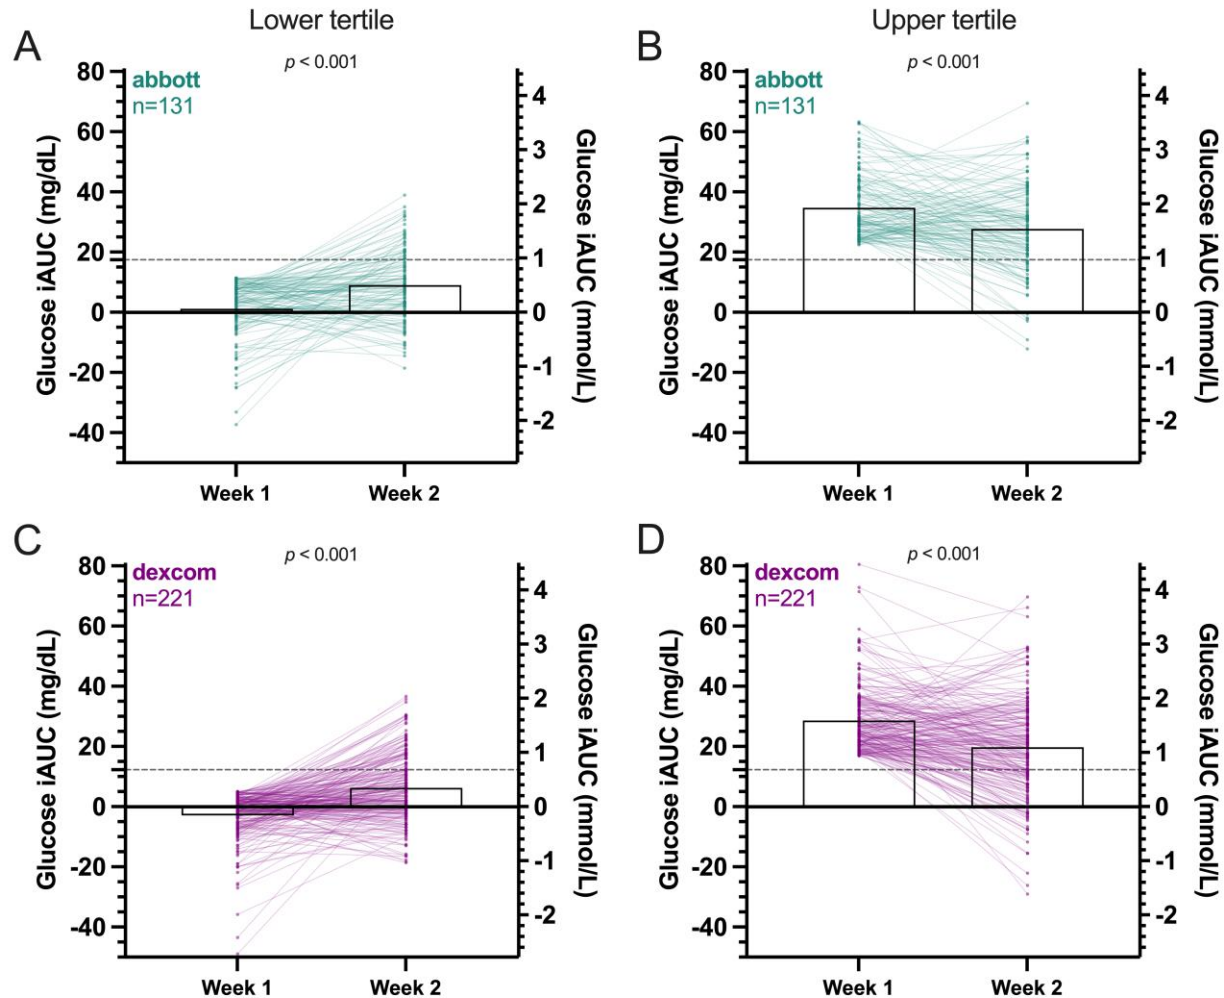

Source: https://medrxiv.org/content/10.1101/2023.06.14.23291406.full.pdf
